# Supplementary material
Source: PubMed Central journal article supplement (PMC7313657)
Supplement: NIHMS1588368-supplement-Supp1.pdf [file NIHMS1588368-supplement-Supp1.pdf]

## Appendix A: Supporting Materials for

### 2D $J$ -Correlated Proton NMR Experiments for Structural Fingerprinting of Biotherapeutics

Robert G. Brinson and John P. Marino\*

Institute for Bioscience and Biotechnology, National Institute of Standards and Technology and the University of Maryland, 9600 Gudelsky Drive, Rockville, Maryland 20850, United States

\* Corresponding author, e-mail: [john.marino@nist.gov](mailto:john.marino@nist.gov)

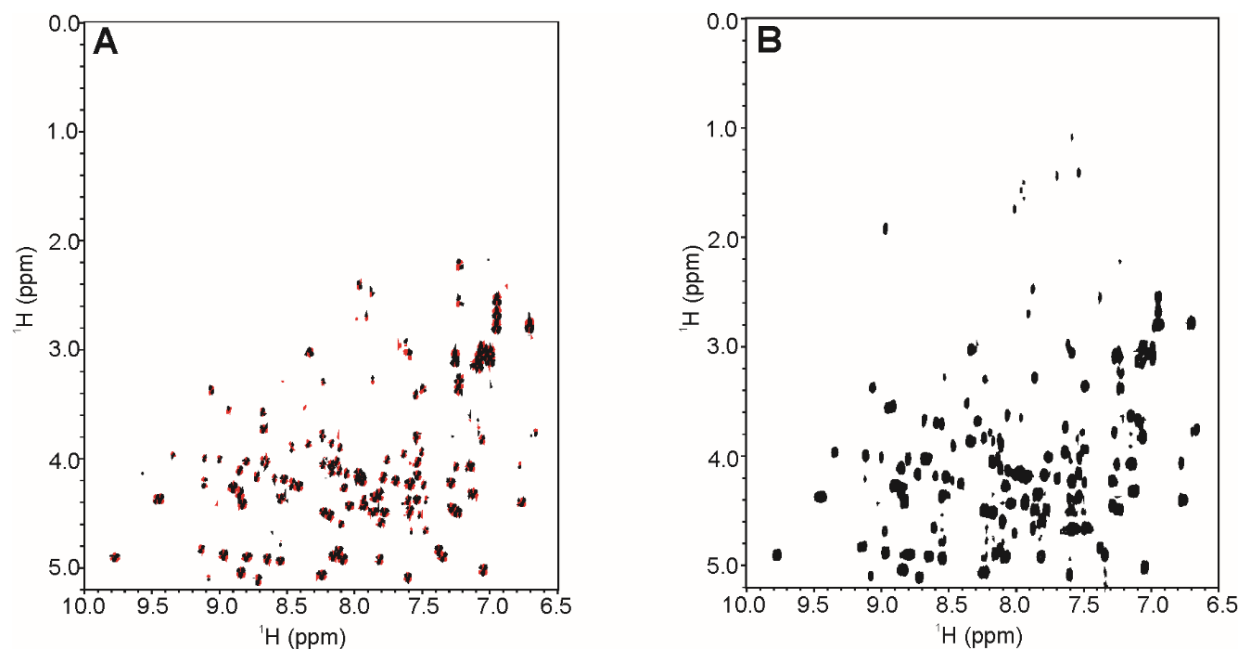

**Fig. S1.** 2D  $^1\text{H}$  COSY spectral fingerprints of  $^1\text{H}_\text{N}$  -  $^1\text{H}_\text{aliphatic}$  region of HEWL collected at 600 MHz and 25 °C. (A) 2D  $^1\text{H}$  DQF-COSY; (B) 2D IP-COSY. Positive contours are shown in black and negative contours in red. The upfield aliphatic region is included for comparative purposes. While setting 3.0 ppm as the upfield cut-off for the fingerprint region, only a few upfield  $\text{H}_\alpha$  resonances are lost for subsequent analysis. However, as can be seen from the TOCSY spectra (Figure S2A, B), many other side chain  $^1\text{H}$  resonances appear  $\leq 3.0$  ppm. Choosing this cut-off predominantly selects for  $^1\text{H}_\text{N}$ - $^1\text{H}_\alpha$  correlations.

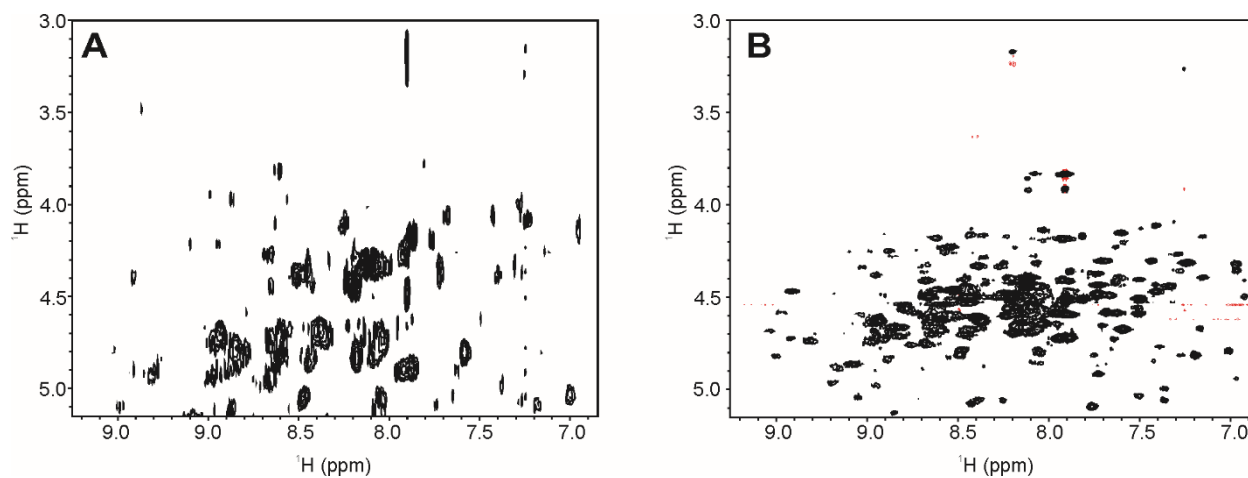

**Fig. S2.** 2D  $^1\text{H}$  homonuclear spectra of  $^1\text{H}_\text{N}$  -  $^1\text{H}_\text{aliphatic}$  region of the NIST-Fab collected at 600 MHz and 50  $^\circ\text{C}$ . (A) 2D  $^1\text{H}$  IP-COSY; (B) 2D  $^1\text{H}$  COIN-TACS using DIPSI-2rc. Positive contours are shown in black and negative contours in red. Negative artifacts in panel B are from residual water, apodization artifacts, or magnetization leakage in the COIN-TACS. The IP-COSY was collected with 32 scans per transient and the COIN-TACS with 16 scans per increment, affording total experimental times of 3 hours 19 minutes and 8 hours 23 minutes, respectively. All other experimental parameters were as described in the Materials and Methods section and Table S2.

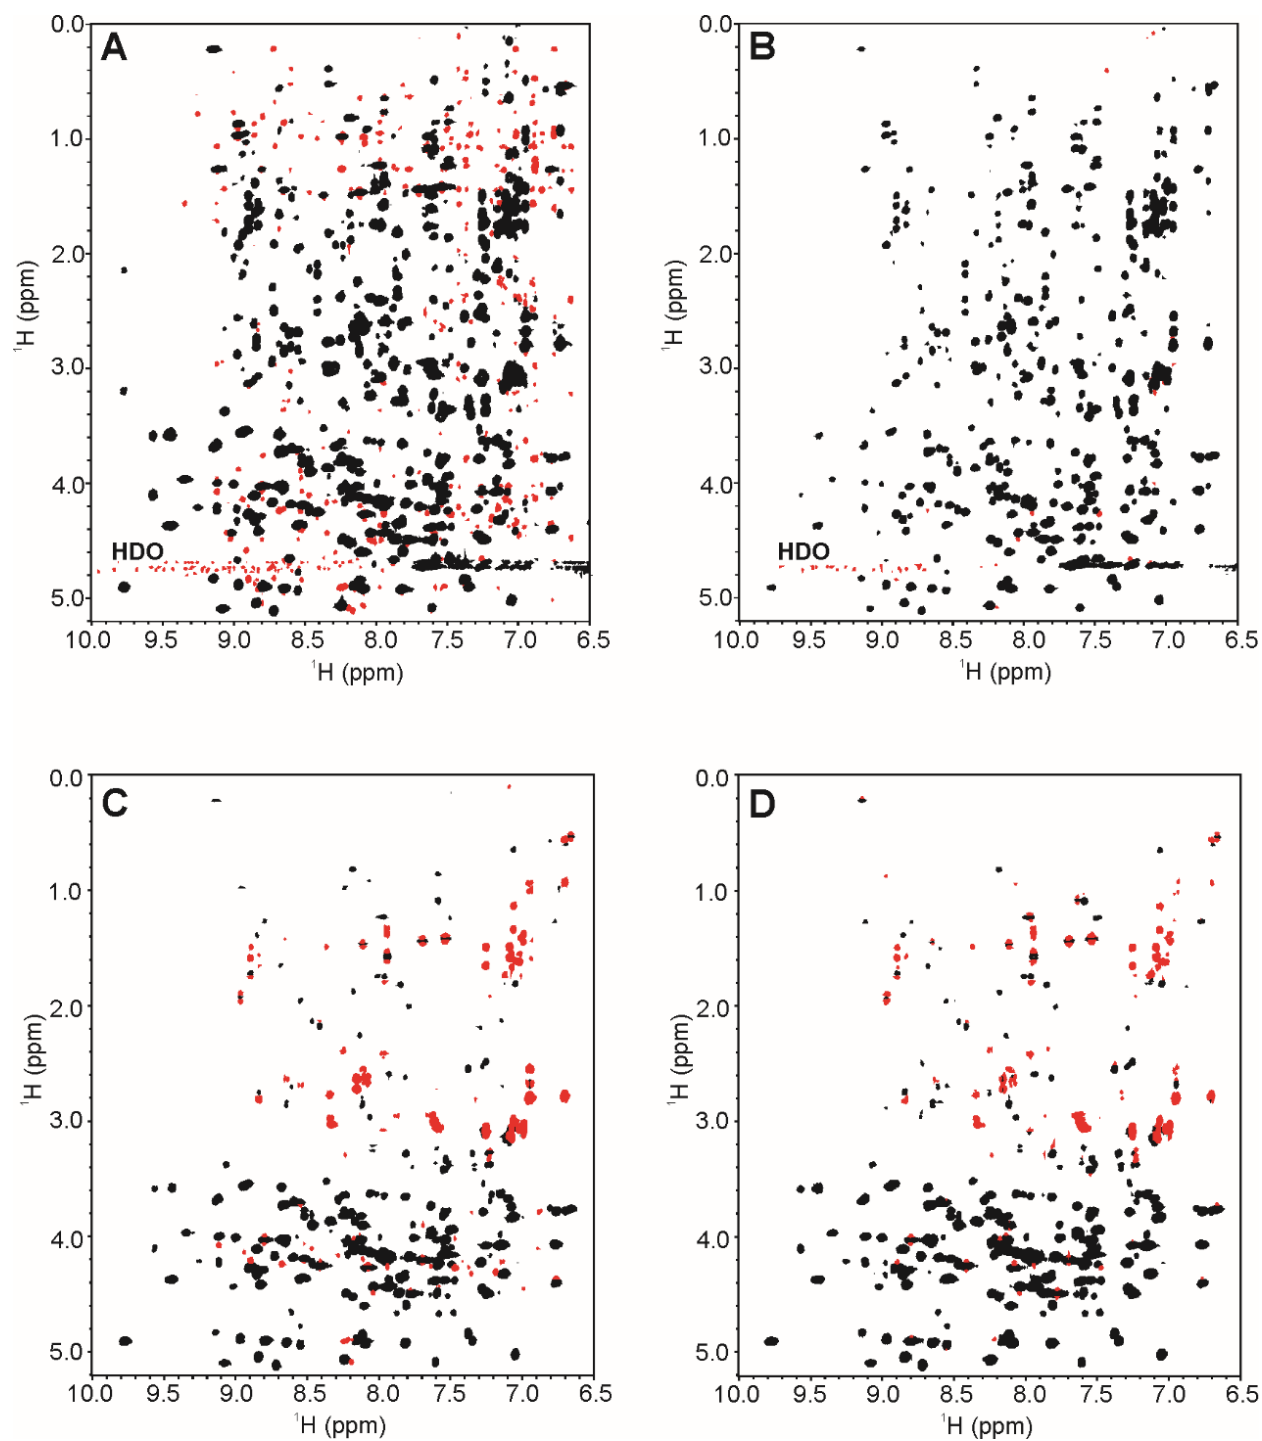

**Fig. S3.** 2D  $^1\text{H}$  TOCSY-type spectra of  $^1\text{H}_\text{N}$  -  $^1\text{H}_\text{aliphatic}$  region of lysozyme collected at 600 MHz and 25  $^\circ\text{C}$ . (A) 2D  $^1\text{H}$  TOCSY using DIPSI-2; (B) 2D  $^1\text{H}$  TOCSY using DIPSI-2rc; (C) 2D  $^1\text{H}$  COIN-TACSYP using DIPSI-2; (D) 2D  $^1\text{H}$  COIN-TACSYP using DIPSI-2rc. Positive contours are shown in black and negative contours in red. ROE artifacts in panels A and C are removed by the addition of a relaxation compensation delay in the DIPSI-2rc pulse train (panels B and D). Additional positive and negative artifacts in panels C and D are from magnetization leakage in the COIN-TACSYP.



**Table S1: Relative peak intensities: qualitative comparison of the sensitivity of the 2D  $^1\text{H}$ ,  $^1\text{H}$  J-correlated spectra**

|            | Relative Peak Height† |        |                   |        |        |
|------------|-----------------------|--------|-------------------|--------|--------|
|            | Slice at 5.05 ppm     |        | Slice at 4.07 ppm |        |        |
|            | Peak 1                | Peak 2 | Peak 3            | Peak 4 | Peak 5 |
| Clean TACS | 1.00                  | 1.00   | 1.00              | 1.00   | 1.00   |
| TACS       | 0.63                  | 0.66   | 0.76              | 0.77   | 0.78   |
| TOCS       | 0.89                  | 1.09   | 0.75              | 0.65   | 0.80   |
| Clean TOCS | 0.33                  | 0.35   | 0.46              | 0.27   | 0.82   |
| IP-COSY    | 0.26                  | 0.26   | 0.08              | 0.09   | 0.08   |

†Each peak is normalized to the intensity in the clean COIN-TACS experiment. The five peaks are labeled accordingly in Fig. 3.

**Table S2: Selected Experimental parameters and overall experimental times. See Materials and Methods Section for complete details.**

|            | Peak Type                               | F1, total points | F2, total points | Mixing Time | Scans | Experimental Time |
|------------|-----------------------------------------|------------------|------------------|-------------|-------|-------------------|
| Clean TACS | $\text{H}_\text{N}-\text{H}_\alpha$     | 2,690            | 1,024            | 85 ms       | 8     | 3 h               |
| TACS       | $\text{H}_\text{N}-\text{H}_\alpha$     | 2,690            | 1,024            | 83 ms       | 8     | 3 h               |
| Clean TOCS | $\text{H}_\text{N}-\text{H}_\text{all}$ | 2,690            | 1,024            | 80 ms       | 8     | 3 h               |
| TOCS       | $\text{H}_\text{N}-\text{H}_\text{all}$ | 2,690            | 1024             | 80 ms       | 8     | 3 h               |
| IP-COSY†   | $\text{H}_\text{N}-\text{H}_\alpha$     | 2,690            | 208              | N/A         | 8     | 0.5 h             |
| DQF-COSY   | $\text{H}_\text{N}-\text{H}_\alpha$     | 2,690            | 1,024            | N/A         | 32    | 12 h              |

†Due to the use of a constant time period for  $t_1$  evolution, the maximum number of total points that could be collected was 208.

### Supplementary References

1. Kupce, E., J. Boyd, and I.D. Campbell, *Short selective pulses for biochemical applications*. J Magn Reson B, 1995. **106**(3): p. 300-3.
2. Shaka, A.J., C.J. Lee, and A. Pines, *Iterative schemes for bilinear operators; application to spin decoupling*. J Magn Reson (1969), 1988. **77**(2): p. 274-293.
3. Cavanagh, J. and M. Rance, *Suppression of cross-relaxation effects in TOCSY spectra via a modified DIPSI-2 mixing sequence*. J Magn Reson (1969), 1992. **96**(3): p. 670-678.
